# Supplementary material for: Is health coaching effective in changing the health status and behaviour of prisoners?—a systematic review protocol
Source: Springer Nature journal article supplement (doi:10.1186/s13643-017-0524-5), 2017-07-03
Supplement: MOESM5 [file 12673246]

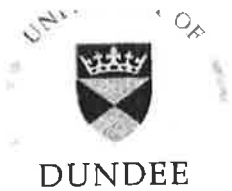

**Invoice/Claim No. 290.804485/1512  
RNHSF94SW**

18 July 2016

Derek Richards  
Consultant in Dental Public Health  
Forth Valley NHS  
Public Health Department  
Carseview House  
Castle Business Park  
Stirling  
FK9 4SW

Researcher Professor R Freeman  
Your Ref Prison Study  
Title Scottish Oral Health Improvement in Prison Group (SOHIPP)  
Customer Code: RNHSF94SW

**April 2016 – March 2017**

National Oral Health Improvement in Prisons Project **37,763**  
Recurrent Funding

**Total Amount Claimed £ 37,763**

Certified By : C.H. Stachon Research Accountant

Remittances quoting **290.804485/1512** should be made payable to **“The University of Dundee”** and addressed to **The Research Finance Office.**

**Enquiries should be made to:**  
Miss Cheryl Chan  
Telephone: (01382) 388139 (Direct Line)  
e-mail: [s.x.chan@dundee.ac.uk](mailto:s.x.chan@dundee.ac.uk)

VAT Registration No: 270 9397 31

**Bank Details:**  
Royal Bank of Scotland  
3 High Street  
Dundee DD1 9LY  
Sort Code: 83-50-00  
Account Code: 00279732  
Swift Code: RBOSGB2L  
IBAN: GB13RBOS83500000279732
